# Supplementary material
Source: Springer Nature journal article supplement (https://www.springermedizin.de/resource/supplementary/12877_2013_950_MOESM4_ESM.pdf/9440732)

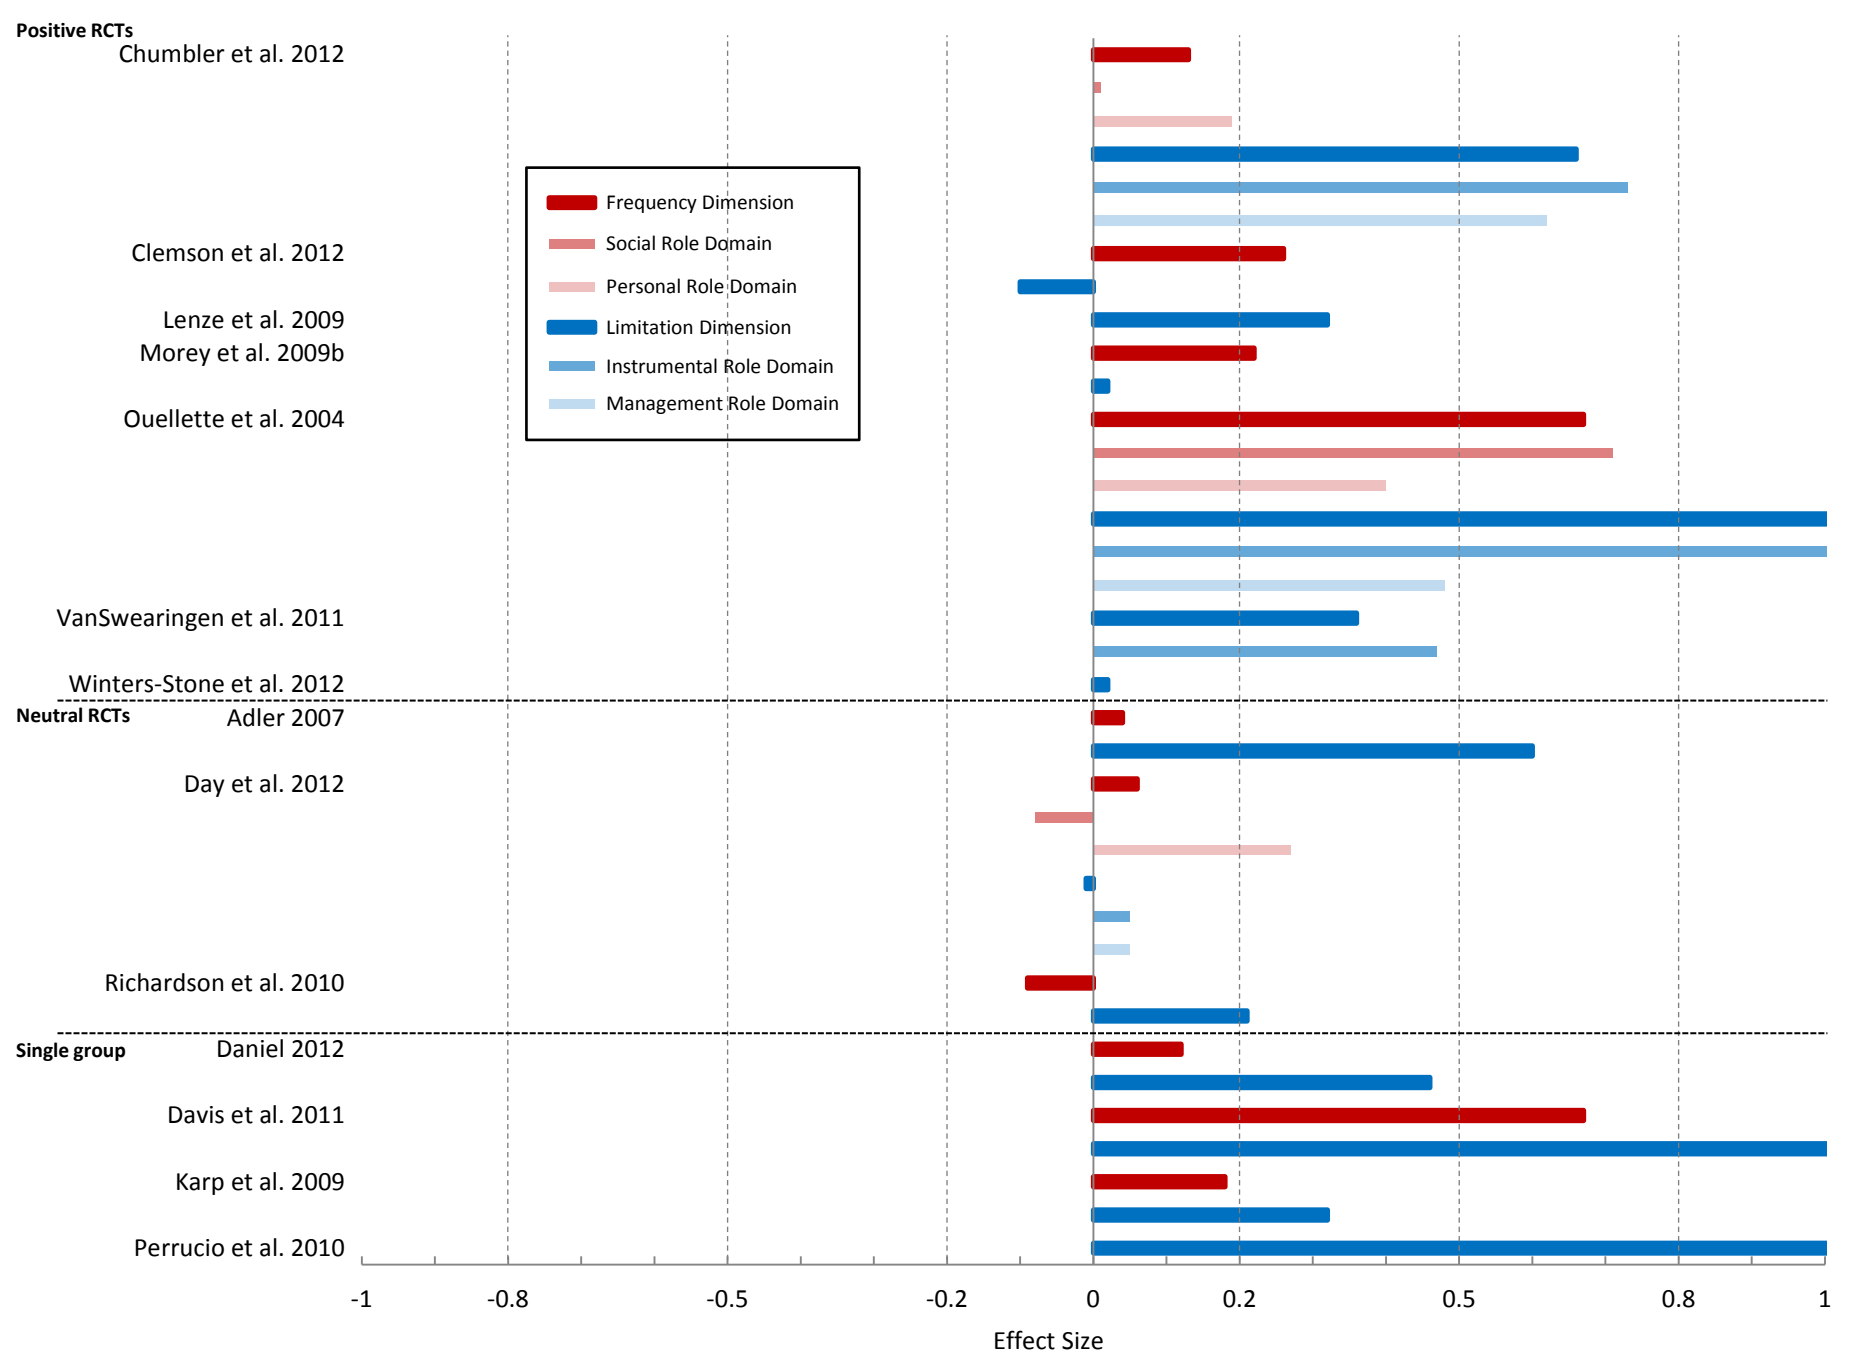

Supplement: MOESM4 [file 9440732]
